# Supplementary material for: Synthesis, Structure, and Electrochemical Properties of 2,3,4,5-Tetraphenyl-1-Monophosphaferrocene Derivatives
Source: MDPI journal article supplement (doi:10.3390/molecules28062481), 2023-03-08
Supplement: s1 [file s1]

# Supplementary Information for:

## **Synthesis, structure, and electrochemical properties of 2,3,4,5-tetraphenyl-1-monophosphaferrocene derivatives**

*Almaz A. Zagidullin<sup>1</sup>, Alena R. Lakomkina<sup>1,2</sup>, Mikhail N. Khrizanforov<sup>1,2</sup>, Robert R. Fayzullin<sup>1</sup>, Kirill V. Kholin<sup>1,3</sup>, Tatiana P. Gerasimova<sup>1</sup>, Ruslan P. Shekurov<sup>1</sup>, Ilya A. Bezkishko<sup>1</sup>, Vasili A. Miluykov<sup>1\*</sup>*

<sup>1</sup> Arbuzov Institute of Organic and Physical Chemistry, FRC Kazan Scientific Center, Russian Academy of Sciences, 8 Arbuzov Street, 420088  
Kazan, Russia

<sup>2</sup> A.M. Butlerov Chemistry Institute of the Kazan Federal University, 18 Kremlevskaya Street, 420008 Kazan, Russia

<sup>3</sup> Department of Physics, Kazan National Research Technological University, 68 Karl Marx Street, 420015 Kazan, Russia

\*Correspondence: [miluykov@iopc.ru](mailto:miluykov@iopc.ru)

## Table of contents

|                                                                                                                                  |    |
|----------------------------------------------------------------------------------------------------------------------------------|----|
| <b>Figure S1.</b> $^{31}\text{P}\{^1\text{H}\}$ NMR spectrum of <b>2</b> .                                                       | 3  |
| <b>Figure S2.</b> $^1\text{H}$ NMR spectrum of <b>2</b> .                                                                        | 4  |
| <b>Figure S3.</b> $^{13}\text{C}\{^1\text{H}\}$ NMR spectrum of <b>2</b> .                                                       | 5  |
| <b>Figure S4.</b> $^{31}\text{P}\{^1\text{H}\}$ NMR spectrum of <b>3</b> .                                                       | 6  |
| <b>Figure S5.</b> $^1\text{H}$ NMR spectrum of <b>3</b> .                                                                        | 7  |
| <b>Figure S6.</b> $^{13}\text{C}\{^1\text{H}\}$ NMR spectrum of <b>3</b> .                                                       | 8  |
| <b>Figure S7.</b> Semi-derivative of CV for oxidation of <b>2</b> .                                                              | 9  |
| <b>Figure S8.</b> Semi-derivative of CV for oxidation of <b>3</b> .                                                              | 10 |
| <b>Table S1.</b> Cartesian coordinates of the optimized $S_0$ ground state structure of <b>2</b> .                               | 11 |
| <b>Table S2.</b> Cartesian coordinates of the optimized $S_0$ ground state structure of cationic form of <b>2</b> with $s=1/2$ . | 12 |
| <b>Table S3.</b> Cartesian coordinates of the optimized $S_0$ ground state structure of cationic form of <b>2</b> with $s=5/2$ . | 13 |
| <b>Table S4.</b> Cartesian coordinates of the optimized $S_0$ ground state structure of <b>3</b> .                               | 14 |
| <b>Table S5.</b> Cartesian coordinates of the optimized $S_0$ ground state structure of cationic form of <b>3</b> with $s=1/2$ . | 15 |
| <b>Table S6.</b> Cartesian coordinates of the optimized $S_0$ ground state structure of cationic form of <b>3</b> with $s=5/2$ . | 16 |

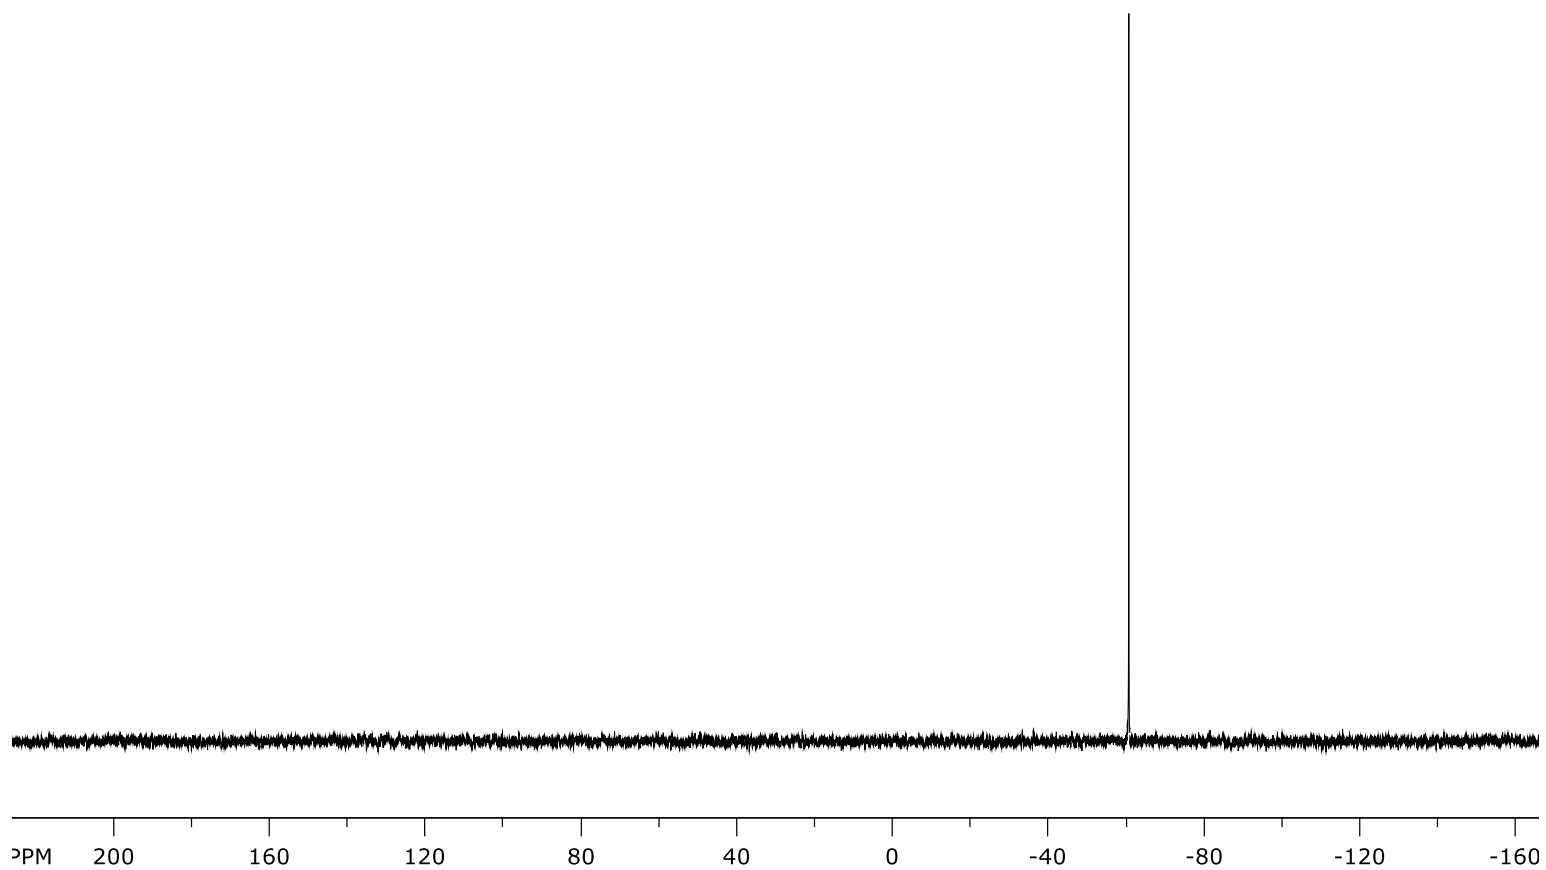

**Figure S1.**  $^{31}\text{P}\{^1\text{H}\}$  NMR spectrum of **2**.

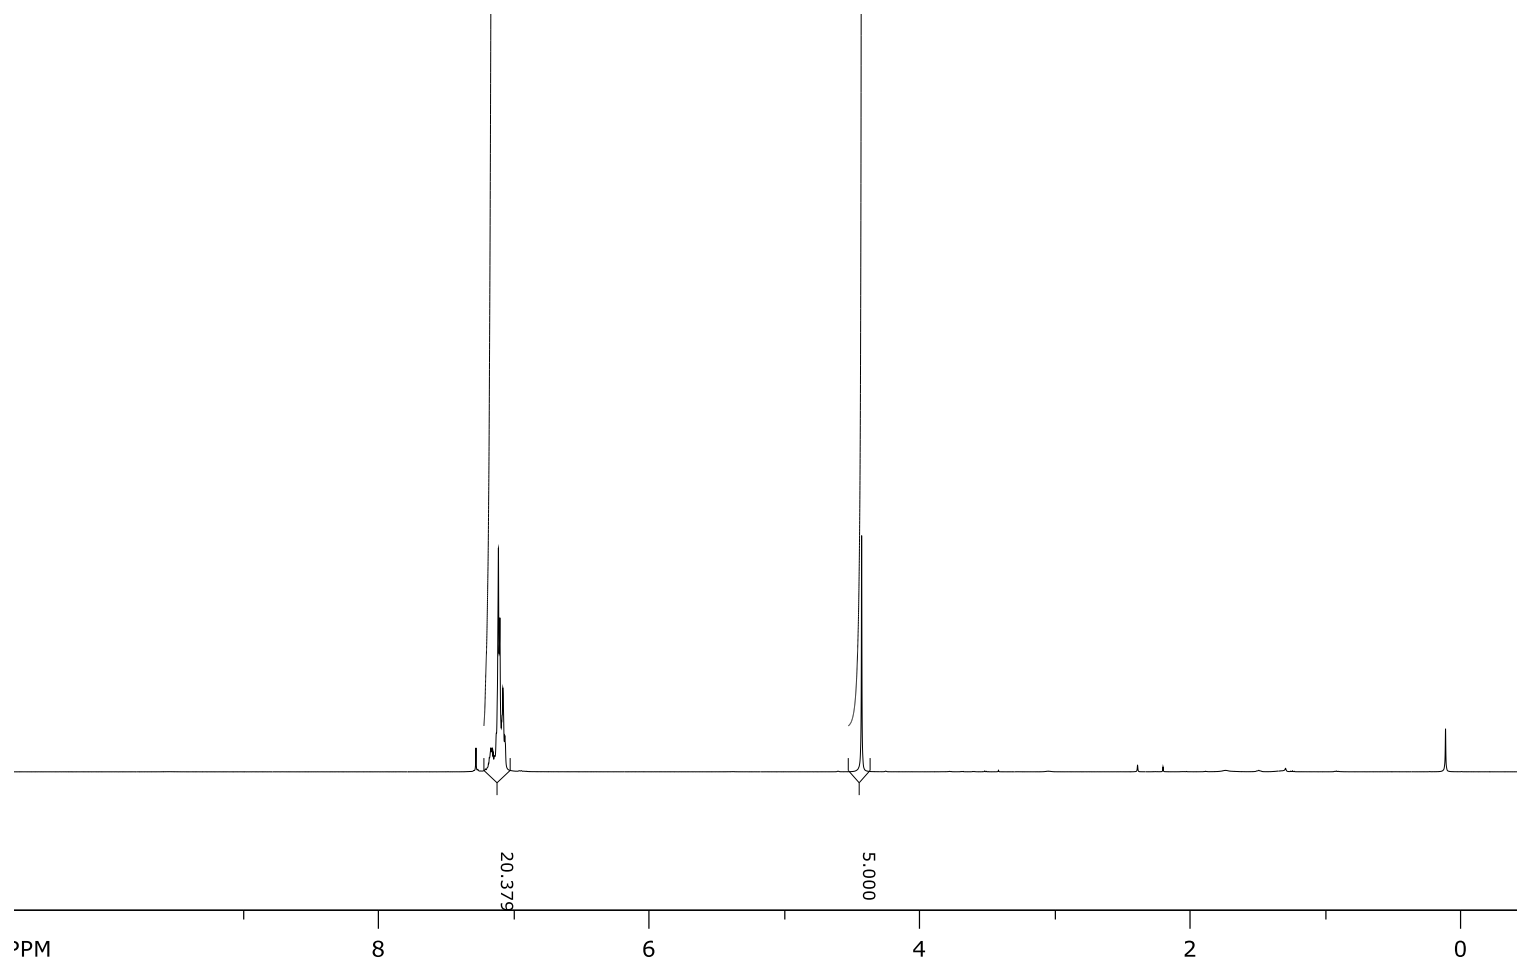

**Figure S2.**  $^1\text{H}$  NMR spectrum of **2**.

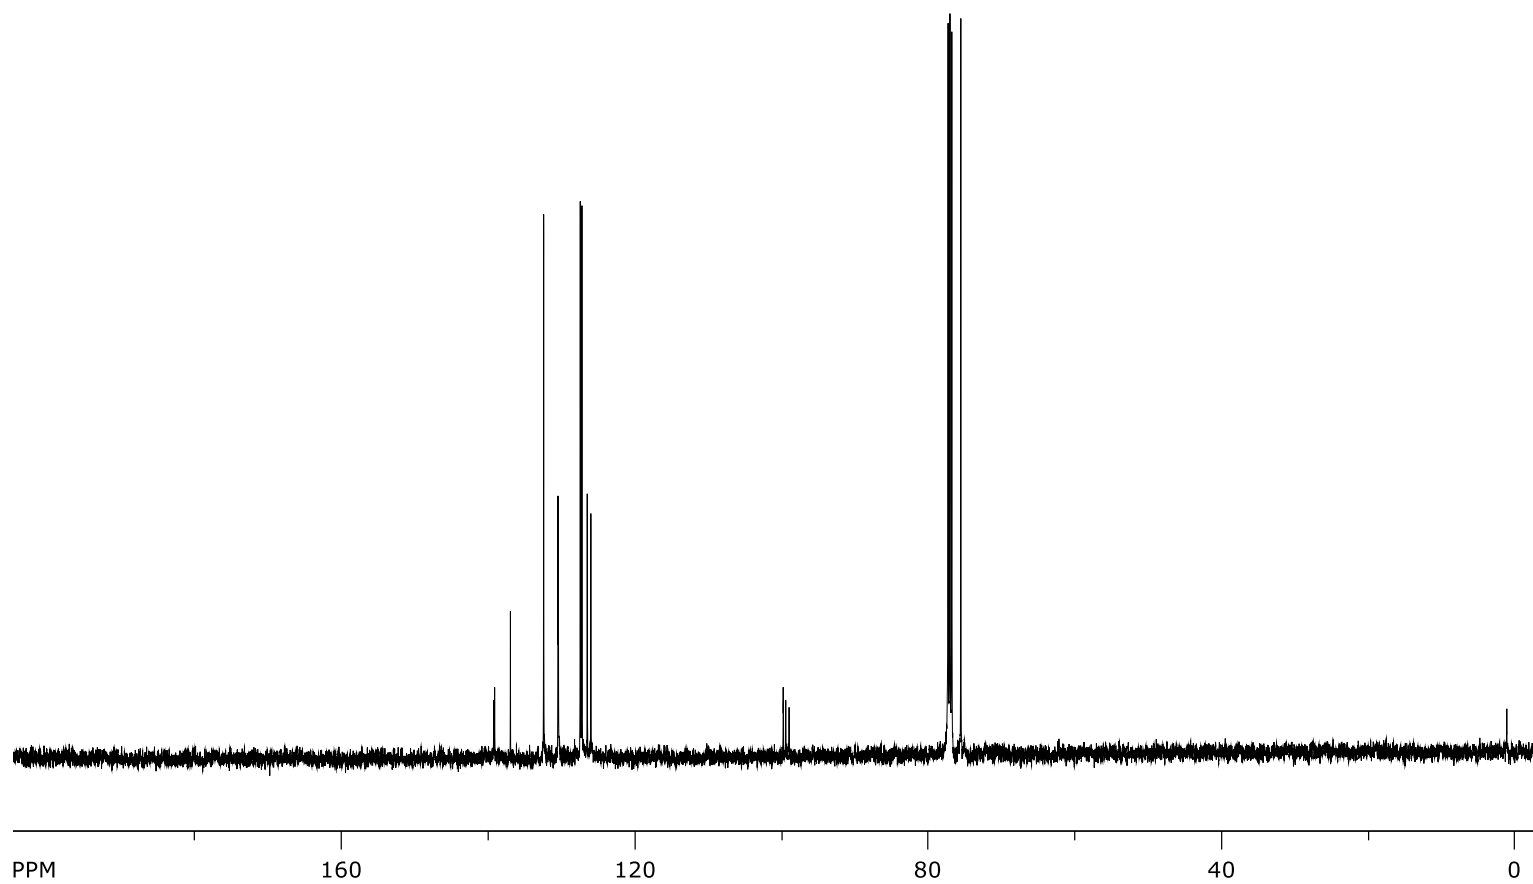

**Figure S3.**  $^{13}\text{C}\{^1\text{H}\}$  NMR spectrum of **2**.

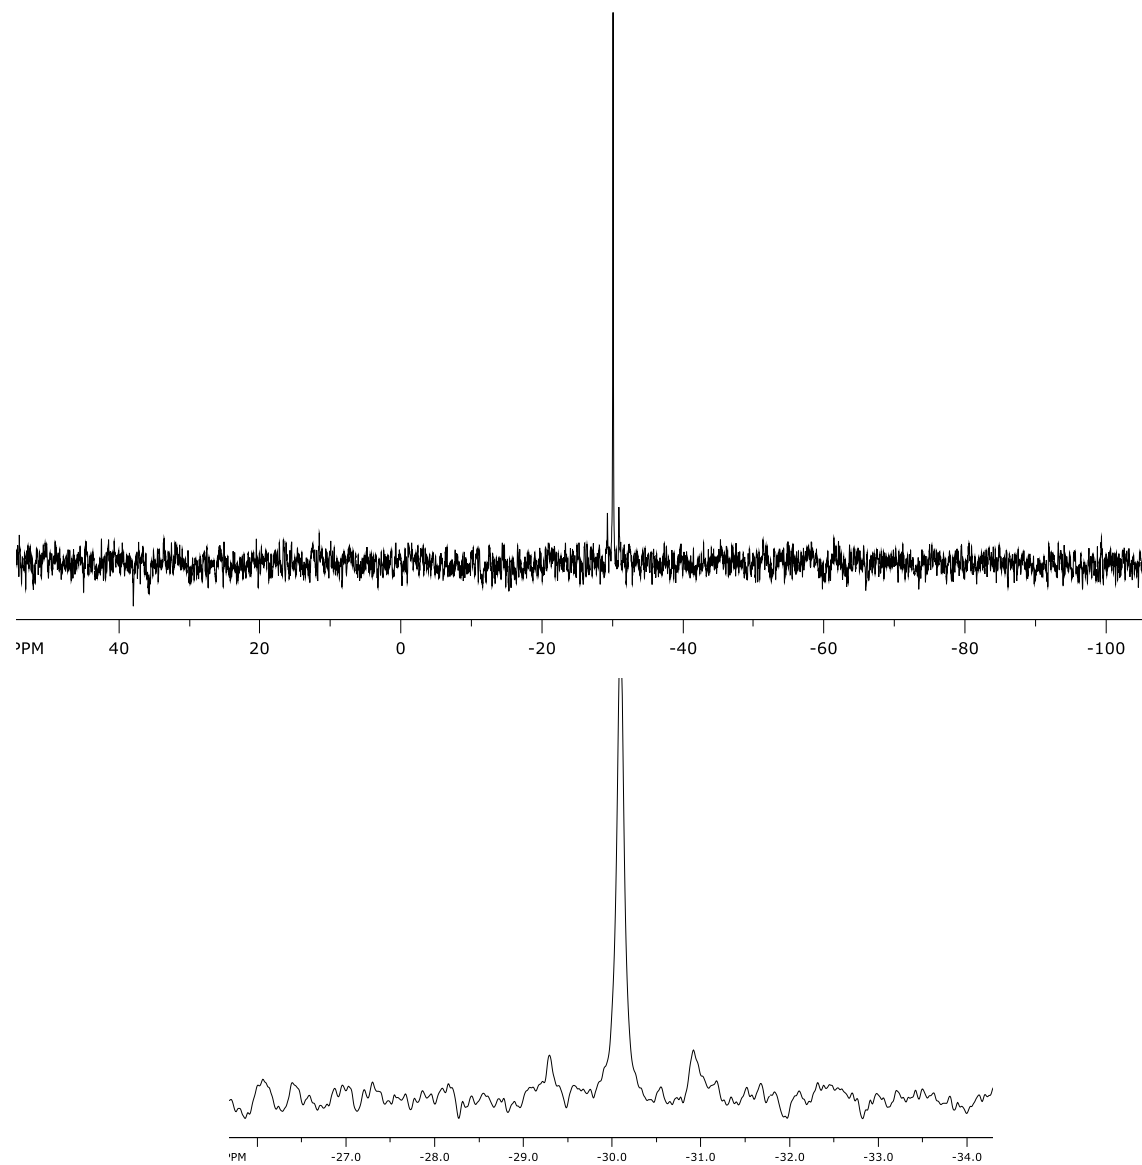

**Figure S4.**  $^{31}\text{P}\{^1\text{H}\}$  NMR spectrum of **3**.

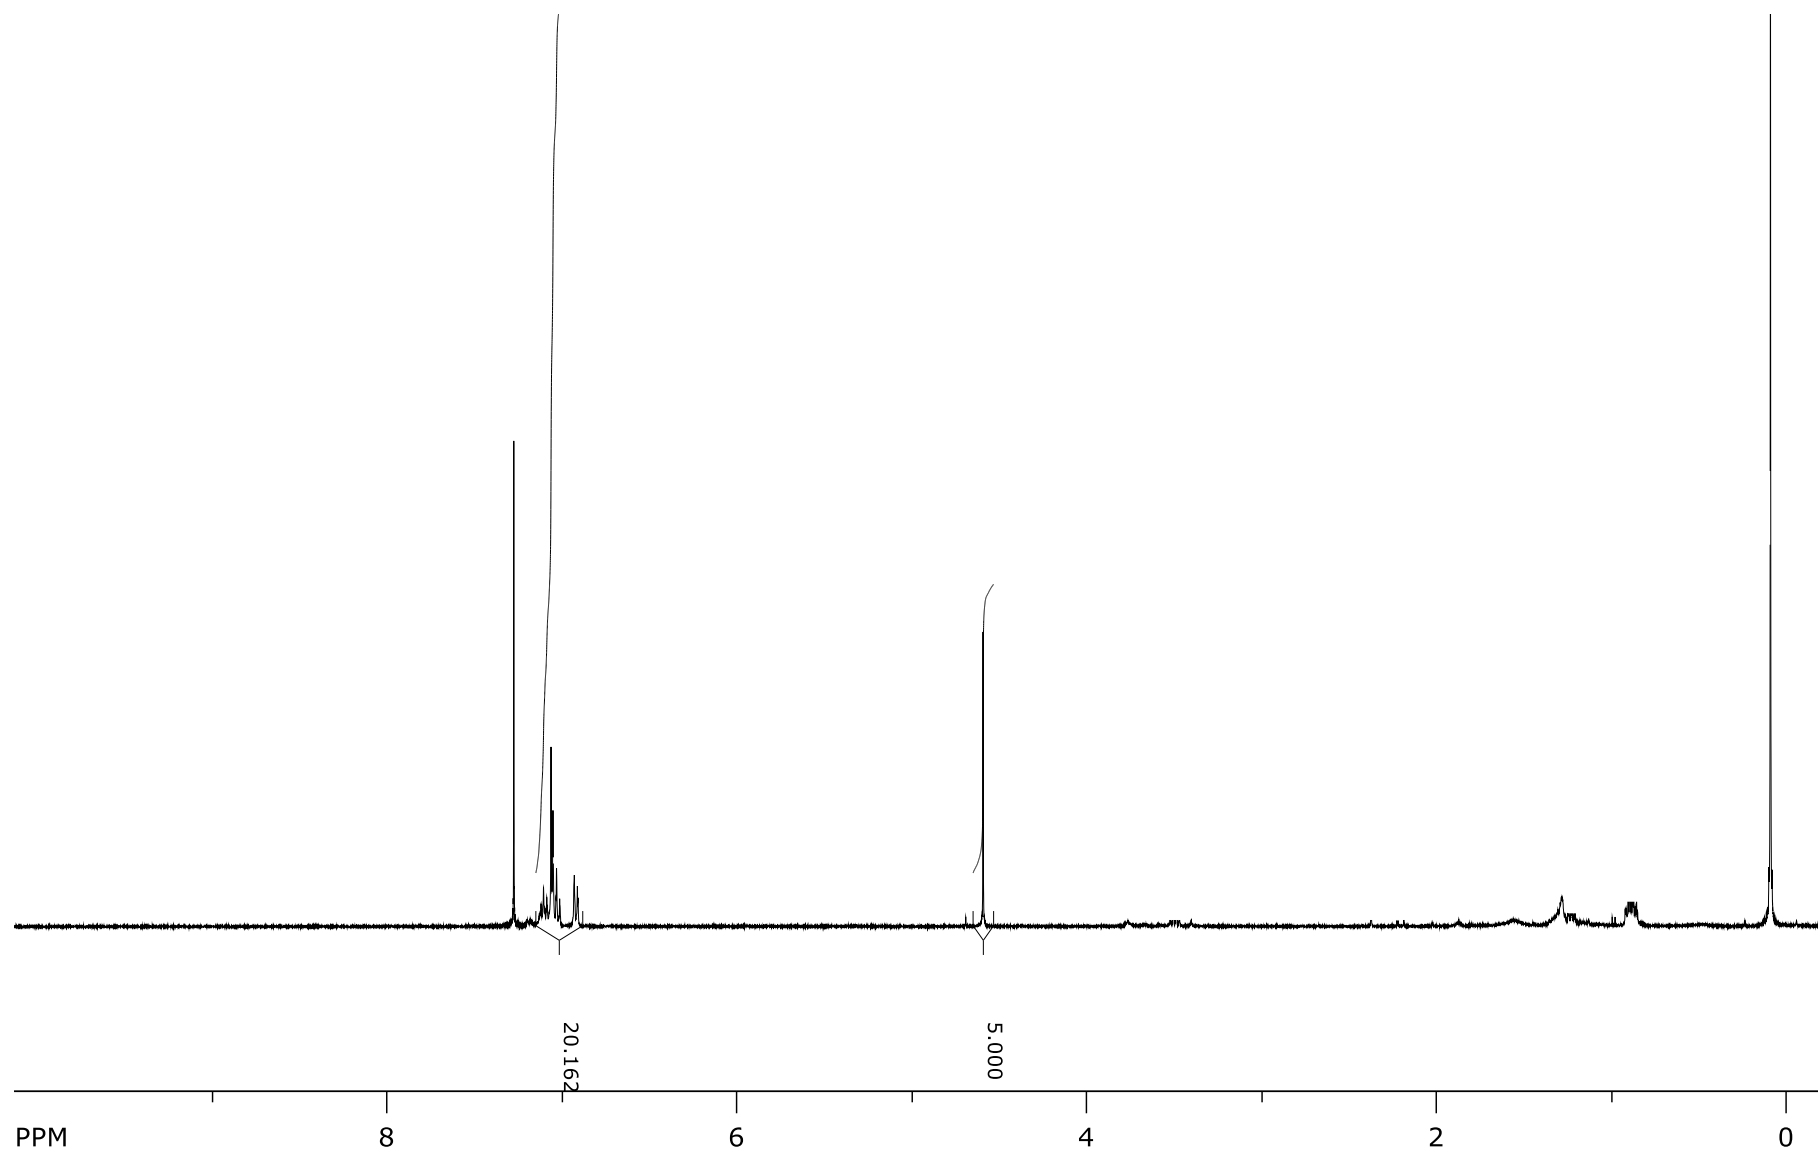

**Figure S5.**  $^1\text{H}$  NMR spectrum of **3**.

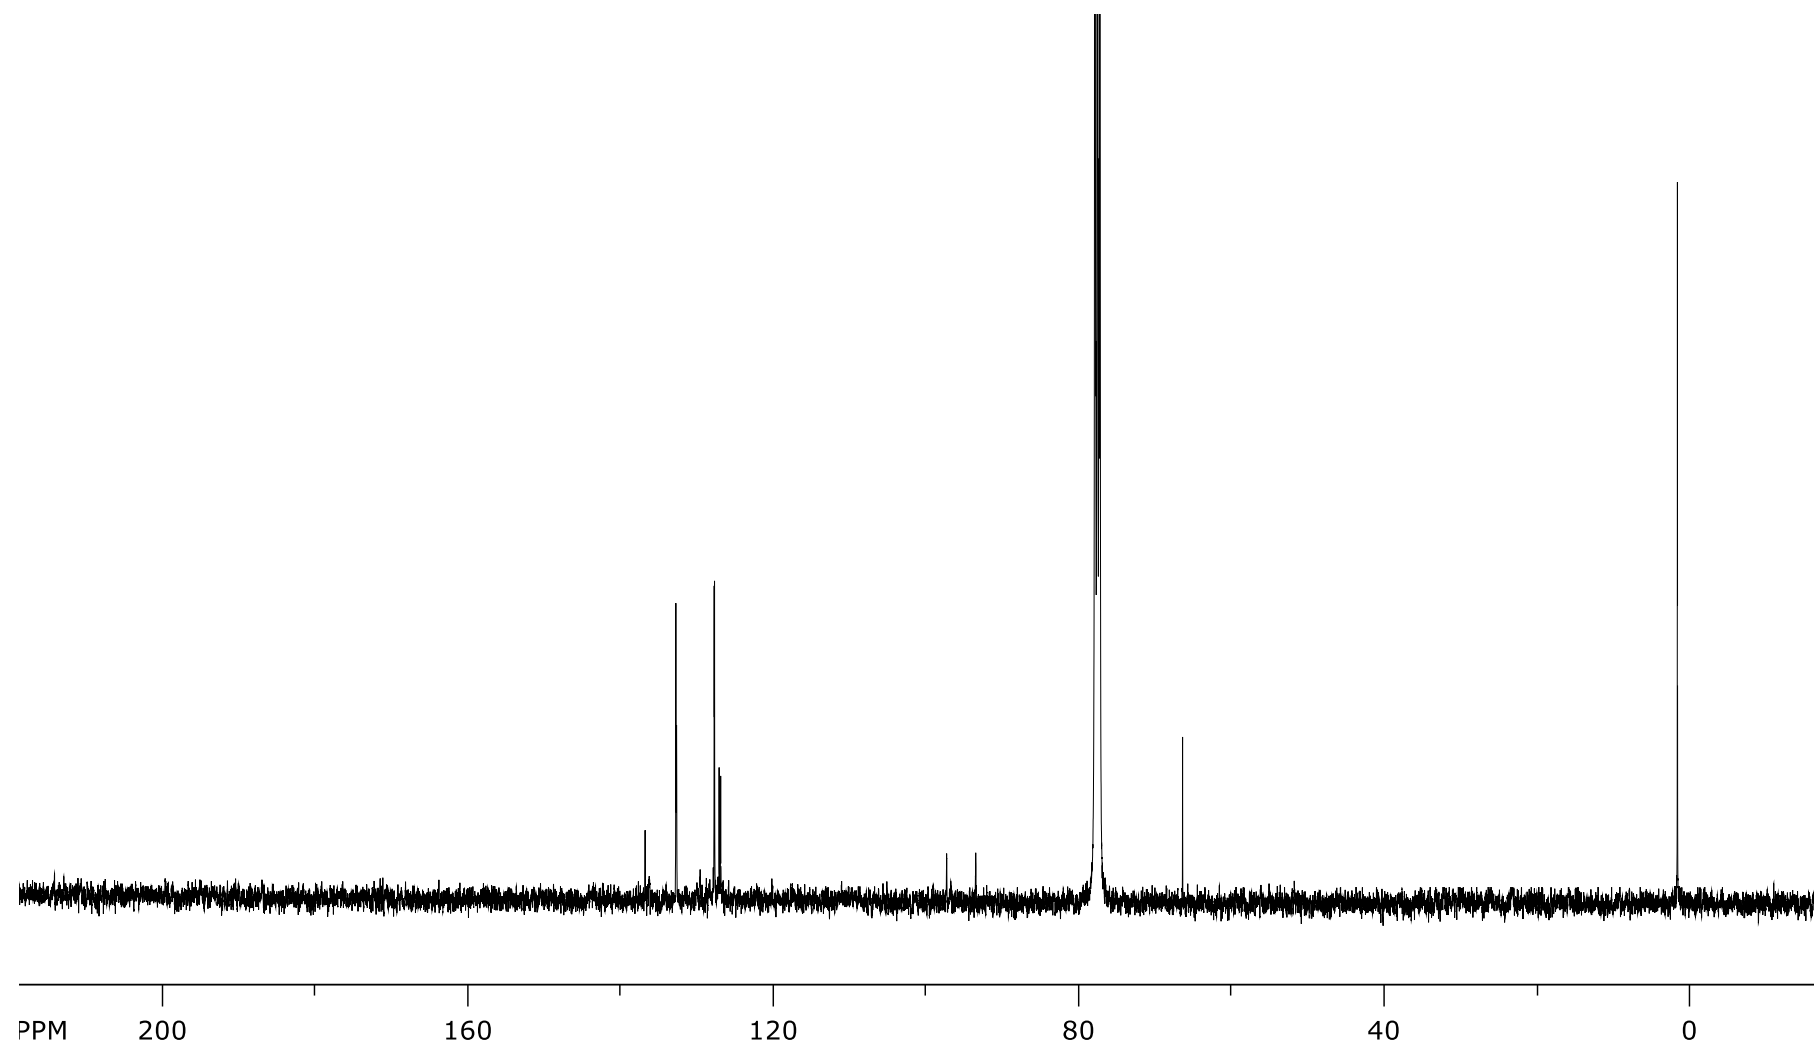

**Figure S6.**  $^{13}\text{C}\{^1\text{H}\}$  NMR spectrum of **3**.



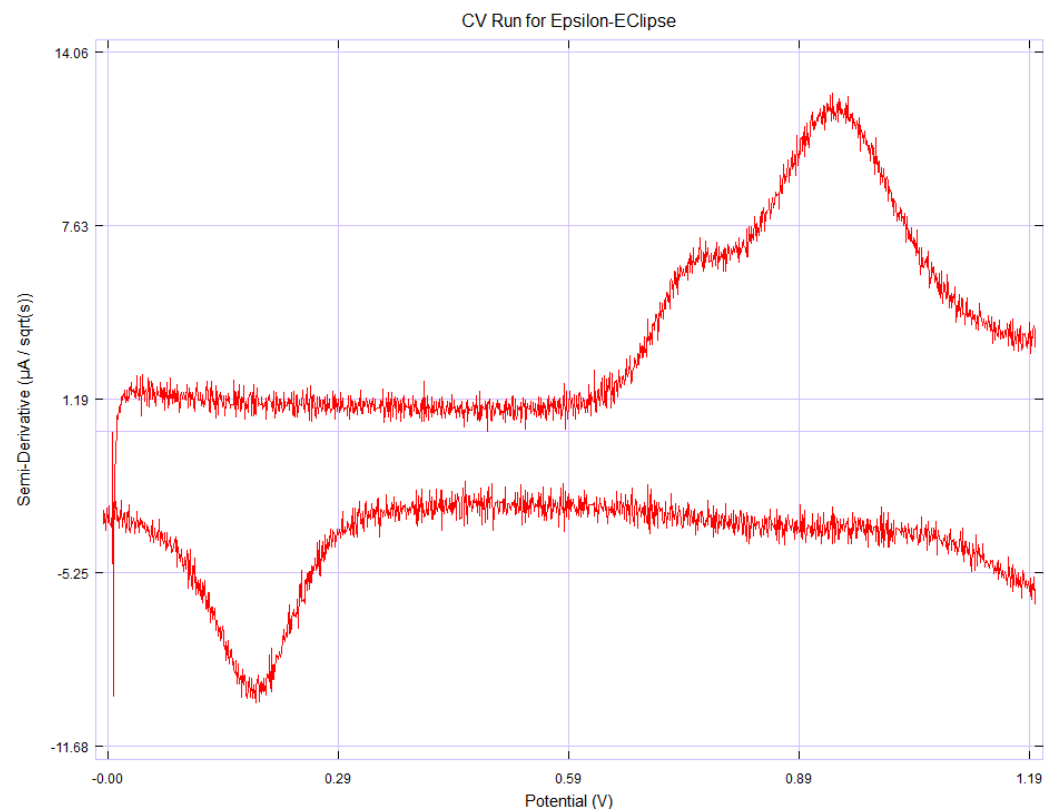

**Figure S7.** Semi-derivative of CV for oxidation of **2**.

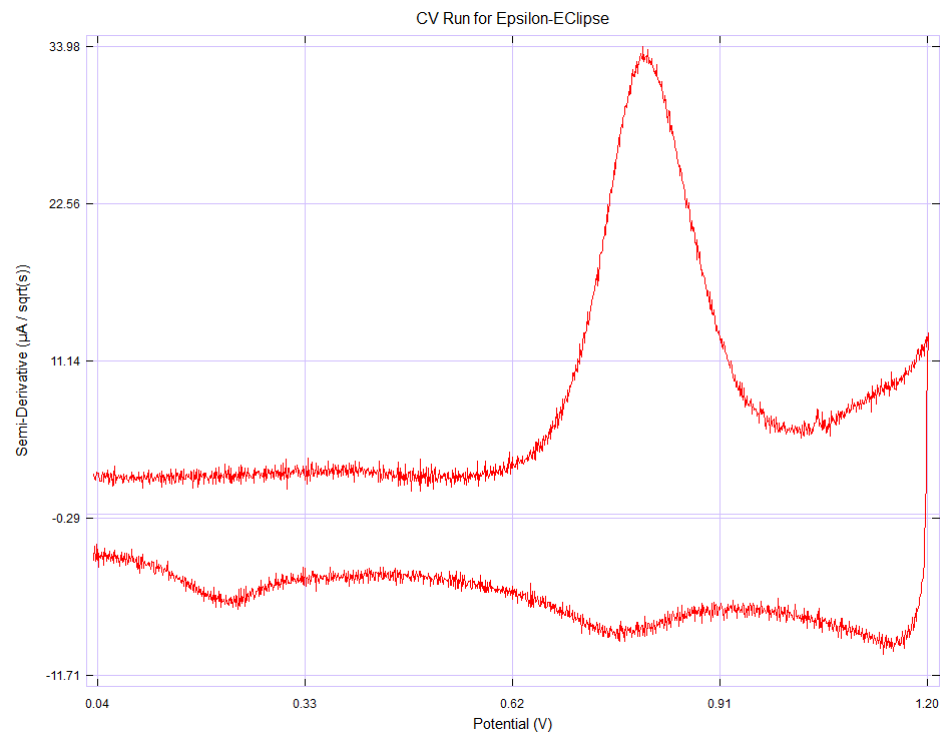

**Figure S8.** Semi-derivative of CV for oxidation of **3**.

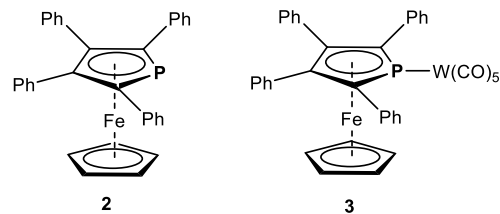

**Table S1.** Cartesian coordinates of the optimized  $S_0$  ground state structure of **2** ( $E=-2876.2633135$ ).

|    | X         | Y         | Z         |
|----|-----------|-----------|-----------|
| Fe | -0.002583 | -0.918024 | 0.918009  |
| P  | 0.002715  | -2.104648 | -1.053163 |
| C  | 1.259150  | -0.868091 | -0.732604 |
| C  | -0.719740 | 0.418750  | -0.475319 |
| C  | -1.538391 | 1.634463  | -0.278291 |
| C  | 0.715644  | 0.421959  | -0.470906 |
| C  | 1.318363  | 2.764511  | -1.045595 |
| H  | 0.518745  | 2.756825  | -1.777523 |
| C  | 2.692429  | -1.197645 | -0.830470 |
| C  | 1.537882  | 1.633541  | -0.260052 |
| C  | -1.358771 | 2.474999  | 0.818609  |
| H  | -0.608386 | 2.220589  | 1.557111  |
| C  | 1.176664  | -1.371090 | 2.540616  |
| H  | 2.249859  | -1.480798 | 2.493723  |
| C  | -1.073945 | -1.828284 | 2.410967  |
| H  | -2.008386 | -2.340063 | 2.236016  |
| C  | 0.224013  | -2.401723 | 2.320825  |
| H  | 0.443690  | -3.430700 | 2.080768  |
| C  | 3.212100  | -2.324145 | -0.190353 |
| H  | 2.551621  | -2.931004 | 0.419421  |

|   |           |           |           |
|---|-----------|-----------|-----------|
| C | -2.118213 | 3.626012  | 0.958737  |
| H | -1.964867 | 4.269882  | 1.817887  |
| C | -2.694307 | -1.214982 | -0.763990 |
| C | -1.257773 | -0.873200 | -0.745655 |
| C | 0.468714  | -0.161568 | 2.769858  |
| H | 0.911038  | 0.808762  | 2.939670  |
| C | -2.493587 | 1.974824  | -1.235301 |
| H | -2.641744 | 1.324207  | -2.089787 |
| C | -4.925071 | -1.068042 | 0.162935  |
| H | -5.595294 | -0.682107 | 0.923424  |
| C | 2.572882  | 1.657336  | 0.673457  |
| H | 2.761750  | 0.773860  | 1.271269  |
| C | -0.921792 | -0.445524 | 2.692412  |
| H | -1.719158 | 0.275590  | 2.791771  |
| C | 2.107387  | 3.894872  | -0.892922 |
| H | 1.920533  | 4.766764  | -1.510166 |
| C | -3.581597 | -0.735196 | 0.202962  |
| H | -3.207586 | -0.091050 | 0.988534  |
| C | -3.070338 | 3.954864  | 0.002360  |
| H | -3.665869 | 4.854366  | 0.112627  |
| C | 3.361975  | 2.786257  | 0.826420  |

|   |           |           |           |
|---|-----------|-----------|-----------|
| H | 4.163599  | 2.786649  | 1.556909  |
| C | 4.549733  | -2.664093 | -0.322891 |
| H | 4.934002  | -3.542719 | 0.183967  |
| C | -3.197444 | -2.045713 | -1.766202 |
| H | -2.523699 | -2.422947 | -2.528384 |
| C | -4.542892 | -2.384393 | -1.804099 |
| H | -4.910979 | -3.031455 | -2.592822 |
| C | 3.130061  | 3.911188  | 0.045301  |
| H | 3.746266  | 4.795360  | 0.165551  |
| C | 3.549156  | -0.425553 | -1.617518 |
| H | 3.159395  | 0.446976  | -2.128661 |
| C | 5.395260  | -1.880686 | -1.096911 |
| H | 6.442765  | -2.142196 | -1.197579 |
| C | -3.253983 | 3.126051  | -1.096039 |
| H | -3.994408 | 3.374979  | -1.848283 |
| C | -5.412987 | -1.896515 | -0.840309 |
| H | -6.464604 | -2.159327 | -0.869108 |
| C | 4.887761  | -0.762321 | -1.744966 |
| H | 5.538074  | -0.147291 | -2.357506 |

**Table S2.** Cartesian coordinates of the optimized S<sub>0</sub> ground state structure of cationic form of **2** with s=1/2 (E=-2876.0144827).

|    | X         | Y         | Z         |
|----|-----------|-----------|-----------|
| Fe | -0.006130 | -0.901588 | 0.918597  |
| P  | -0.001882 | -2.091899 | -1.045432 |
| C  | 1.269321  | -0.852590 | -0.743866 |
| C  | -0.711075 | 0.453838  | -0.515741 |
| C  | -1.525458 | 1.667382  | -0.301972 |
| C  | 0.730702  | 0.446570  | -0.506731 |
| C  | 1.324395  | 2.792428  | -1.039121 |
| H  | 0.535888  | 2.794340  | -1.782731 |
| C  | 2.698578  | -1.198456 | -0.829062 |
| C  | 1.546768  | 1.654369  | -0.264984 |
| C  | -1.339548 | 2.498014  | 0.801488  |
| H  | -0.579466 | 2.252696  | 1.534054  |
| C  | 1.154628  | -1.437266 | 2.557093  |
| H  | 2.226900  | -1.554793 | 2.502485  |
| C  | -1.102884 | -1.862524 | 2.390152  |
| H  | -2.042854 | -2.352584 | 2.183716  |
| C  | 0.190957  | -2.449912 | 2.286943  |
| H  | 0.400784  | -3.473120 | 2.015810  |
| C  | 3.191536  | -2.359149 | -0.230082 |
| H  | 2.523806  | -2.990901 | 0.346728  |

|   |           |           |           |
|---|-----------|-----------|-----------|
| C | -2.107216 | 3.641025  | 0.953554  |
| H | -1.957811 | 4.279863  | 1.816349  |
| C | -2.694148 | -1.199266 | -0.767169 |
| C | -1.263671 | -0.841113 | -0.755522 |
| C | 0.458916  | -0.230212 | 2.835185  |
| H | 0.910799  | 0.729128  | 3.038720  |
| C | -2.483767 | 2.003168  | -1.257361 |
| H | -2.634422 | 1.360097  | -2.116983 |
| C | -4.934926 | -1.037248 | 0.119278  |
| H | -5.626040 | -0.620261 | 0.842849  |
| C | 2.568574  | 1.663222  | 0.683301  |
| H | 2.765508  | 0.770800  | 1.265888  |
| C | -0.934759 | -0.494065 | 2.732439  |
| H | -1.723418 | 0.235516  | 2.839709  |
| C | 2.110825  | 3.920516  | -0.862193 |
| H | 1.933752  | 4.798398  | -1.472584 |
| C | -3.600926 | -0.671529 | 0.156747  |
| H | -3.260574 | 0.036565  | 0.902226  |
| C | -3.059291 | 3.971853  | -0.002646 |
| H | -3.656989 | 4.868404  | 0.114603  |
| C | 3.344618  | 2.795451  | 0.866812  |

|   |           |           |           |
|---|-----------|-----------|-----------|
| H | 4.134885  | 2.793093  | 1.608663  |
| C | 4.524850  | -2.710313 | -0.365531 |
| H | 4.895659  | -3.612174 | 0.107817  |
| C | -3.159618 | -2.103676 | -1.723252 |
| H | -2.472849 | -2.515887 | -2.455346 |
| C | -4.498446 | -2.464114 | -1.762640 |
| H | -4.844532 | -3.160789 | -2.517222 |
| C | 3.116579  | 3.927345  | 0.094066  |
| H | 3.726157  | 4.812422  | 0.234940  |
| C | 3.564645  | -0.404712 | -1.583066 |
| H | 3.193005  | 0.490337  | -2.067134 |
| C | 5.382001  | -1.909535 | -1.108866 |
| H | 6.425053  | -2.183571 | -1.216251 |
| C | -3.241451 | 3.154599  | -1.109801 |
| H | -3.979546 | 3.411372  | -1.860738 |
| C | -5.388774 | -1.934121 | -0.840927 |
| H | -6.434595 | -2.217153 | -0.869390 |
| C | 4.896471  | -0.761999 | -1.720815 |
| H | 5.558095  | -0.139926 | -2.312477 |

**Table S3.** Cartesian coordinates of the optimized  $S_0$  ground state structure of cationic form of **2** with  $s=5/2$  ( $E=-2875.9955656$ ).

|    | X         | Y         | Z         |
|----|-----------|-----------|-----------|
| Fe | -0.248002 | -1.462019 | 0.907055  |
| P  | -0.002053 | -1.922430 | -1.409983 |
| C  | 1.267882  | -0.753350 | -0.906559 |
| C  | -0.695886 | 0.568300  | -0.638568 |
| C  | -1.491657 | 1.775119  | -0.350679 |
| C  | 0.741759  | 0.524658  | -0.590601 |
| C  | 1.360387  | 2.913950  | -0.888779 |
| H  | 0.567166  | 3.009702  | -1.620597 |
| C  | 2.689394  | -1.115860 | -0.988169 |
| C  | 1.575115  | 1.687992  | -0.253828 |
| C  | -1.302498 | 2.508953  | 0.820893  |
| H  | -0.543361 | 2.201496  | 1.529653  |
| C  | 1.212382  | -1.422585 | 2.776515  |
| H  | 2.284097  | -1.510543 | 2.671626  |
| C  | -1.015217 | -1.959098 | 2.987706  |
| H  | -1.930244 | -2.522173 | 3.103377  |
| C  | 0.295418  | -2.502773 | 2.882253  |
| H  | 0.546887  | -3.553989 | 2.890591  |
| C  | 3.145439  | -2.313253 | -0.430766 |
| H  | 2.449288  | -2.960162 | 0.095120  |

|   |           |           |           |
|---|-----------|-----------|-----------|
| C | -2.068932 | 3.634254  | 1.076180  |
| H | -1.915976 | 4.193925  | 1.991789  |
| C | -2.682620 | -1.047242 | -0.976414 |
| C | -1.264845 | -0.671510 | -1.004163 |
| C | 0.475102  | -0.217523 | 2.824300  |
| H | 0.890310  | 0.777085  | 2.758635  |
| C | -2.453897 | 2.198352  | -1.268838 |
| H | -2.605193 | 1.636420  | -2.183732 |
| C | -4.868546 | -0.977362 | 0.059165  |
| H | -5.526853 | -0.593671 | 0.830014  |
| C | 2.611176  | 1.580461  | 0.677860  |
| H | 2.801879  | 0.627879  | 1.157649  |
| C | -0.900145 | -0.543868 | 2.952755  |
| H | -1.716074 | 0.161430  | 3.016327  |
| C | 2.165049  | 4.003471  | -0.597330 |
| H | 1.995831  | 4.945740  | -1.105371 |
| C | -3.551428 | -0.558164 | 0.011801  |
| H | -3.187851 | 0.157768  | 0.739339  |
| C | -3.023440 | 4.049454  | 0.156411  |
| H | -3.618615 | 4.933714  | 0.353149  |
| C | 3.399911  | 2.676609  | 0.982000  |

|   |           |           |           |
|---|-----------|-----------|-----------|
| H | 4.195014  | 2.582105  | 1.712611  |
| C | 4.478258  | -2.677903 | -0.532616 |
| H | 4.819512  | -3.605601 | -0.087912 |
| C | -3.176889 | -1.970865 | -1.906988 |
| H | -2.522290 | -2.353939 | -2.682628 |
| C | -4.499785 | -2.374550 | -1.864416 |
| H | -4.871559 | -3.075941 | -2.602183 |
| C | 3.179673  | 3.890976  | 0.343722  |
| H | 3.801968  | 4.747371  | 0.576654  |
| C | 3.596029  | -0.300349 | -1.671325 |
| H | 3.254750  | 0.622906  | -2.123573 |
| C | 5.371669  | -1.857675 | -1.208413 |
| H | 6.413749  | -2.143235 | -1.293114 |
| C | -3.209572 | 3.332741  | -1.018362 |
| H | -3.947451 | 3.657444  | -1.742835 |
| C | -5.348764 | -1.881732 | -0.880822 |
| H | -6.383673 | -2.201988 | -0.846911 |
| C | 4.924728  | -0.674189 | -1.782155 |
| H | 5.616039  | -0.037452 | -2.321995 |

**Table S4.** Cartesian coordinates of the optimized S<sub>0</sub> ground state structure of **3** (E=-3509.7437236).

|    | X         | Y         | Z         |
|----|-----------|-----------|-----------|
| W  | 2.998060  | 0.041178  | -0.235872 |
| Fe | -1.162350 | -0.010706 | 1.291768  |
| P  | 0.487340  | 0.017489  | -0.273467 |
| O  | 3.129532  | -1.625115 | 2.491406  |
| O  | 2.851013  | 2.755984  | 1.465282  |
| O  | 3.145003  | 1.644920  | -3.007618 |
| O  | 6.161457  | 0.125135  | -0.191963 |
| C  | -0.346364 | -2.697789 | -0.334925 |
| C  | 3.059858  | -1.026710 | 1.518073  |
| C  | 2.904386  | 1.799904  | 0.844255  |
| C  | -0.460579 | 2.712653  | -0.289275 |
| C  | 5.016207  | 0.092332  | -0.209343 |
| C  | -0.754501 | -3.509247 | -1.394267 |
| H  | -1.399272 | -3.097513 | -2.162224 |
| C  | -2.066809 | 0.692927  | -0.421222 |
| C  | -0.165789 | -0.250121 | 3.076801  |
| H  | 0.884933  | -0.472822 | 3.170914  |
| C  | -2.142131 | 0.898182  | 2.851650  |
| H  | -2.861933 | 1.694300  | 2.734375  |
| C  | -2.042801 | -0.743758 | -0.420629 |
| C  | -4.420039 | 1.259198  | 0.242446  |
| H  | -4.378666 | 0.477224  | 0.990424  |
| C  | -0.339613 | -4.829260 | -1.468129 |
| H  | -0.664112 | -5.447067 | -2.298129 |

|   |           |           |           |
|---|-----------|-----------|-----------|
| C | 3.063213  | 1.079437  | -2.017776 |
| C | -0.767063 | 1.269400  | -0.320958 |
| C | 0.486223  | -3.239710 | 0.643237  |
| H | 0.799640  | -2.616100 | 1.470939  |
| C | -5.219905 | -2.206697 | -1.813729 |
| H | -5.892546 | -2.028253 | -2.645342 |
| C | -0.727110 | -1.276056 | -0.303282 |
| C | 0.494267  | -5.358301 | -0.491420 |
| H | 0.822779  | -6.389514 | -0.555472 |
| C | -2.437246 | -0.491475 | 2.832919  |
| H | -3.413038 | -0.933836 | 2.699138  |
| C | -5.577322 | 2.002494  | 0.075200  |
| H | -6.438600 | 1.804234  | 0.703629  |
| C | -5.634863 | 2.996380  | -0.893344 |
| H | -6.539630 | 3.579817  | -1.022807 |
| C | -1.215820 | -1.200572 | 2.972110  |
| H | -1.099124 | -2.273612 | 2.957555  |
| C | 0.906542  | -4.558659 | 0.565249  |
| H | 1.559460  | -4.959967 | 1.332496  |
| C | 0.434347  | 3.242254  | -1.217878 |
| H | 0.878339  | 2.588695  | -1.958267 |
| C | -4.592547 | -3.472177 | 0.127290  |
| H | -4.771335 | -4.289470 | 0.817262  |
| C | -1.051450 | 3.574593  | 0.634326  |
| H | -1.761925 | 3.176138  | 1.346798  |

|   |           |           |           |
|---|-----------|-----------|-----------|
| C | -4.115725 | -1.386212 | -1.636335 |
| H | -3.930001 | -0.569111 | -2.324020 |
| C | -3.301660 | 1.496026  | -0.555267 |
| C | -5.463889 | -3.249943 | -0.931251 |
| H | -6.328255 | -3.889922 | -1.069338 |
| C | 0.161878  | 5.439269  | -0.282783 |
| H | 0.407576  | 6.495219  | -0.274006 |
| C | -3.369787 | 2.493079  | -1.527468 |
| H | -2.505670 | 2.686599  | -2.152513 |
| C | 0.746318  | 4.593912  | -1.214095 |
| H | 1.449332  | 4.983568  | -1.941926 |
| C | -0.737600 | 1.047769  | 2.997817  |
| H | -0.191706 | 1.979423  | 2.997666  |
| C | -3.241333 | -1.596608 | -0.571229 |
| C | -4.527782 | 3.237804  | -1.694763 |
| H | -4.563143 | 4.010838  | -2.454359 |
| C | -0.744334 | 4.925151  | 0.636424  |
| H | -1.211402 | 5.580295  | 1.363534  |
| C | -3.489371 | -2.652708 | 0.303996  |
| H | -2.801518 | -2.831564 | 1.121461  |
| C | 3.034284  | -1.737453 | -1.293572 |
| O | 3.072976  | -2.713995 | -1.880900 |

**Table S5.** Cartesian coordinates of the optimized  $S_0$  ground state structure of cationic form of **3** with  $s=1/2$  ( $E=-3509.4856078$ ).

|    | X         | Y         | Z         |
|----|-----------|-----------|-----------|
| W  | -2.964590 | -0.058400 | -0.246081 |
| Fe | 1.196310  | 0.009336  | 1.312289  |
| P  | -0.519705 | -0.032789 | -0.264457 |
| O  | -3.133205 | 1.508150  | 2.537358  |
| O  | -2.919982 | -2.846278 | 1.341557  |
| O  | -3.078772 | -1.567603 | -3.079577 |
| O  | -6.146095 | -0.119384 | -0.286926 |
| C  | 0.298361  | 2.696358  | -0.296172 |
| C  | -3.067616 | 0.945958  | 1.544799  |
| C  | -2.937022 | -1.865882 | 0.762261  |
| C  | 0.482347  | -2.714844 | -0.265106 |
| C  | -5.008800 | -0.095822 | -0.274869 |
| C  | 0.694051  | 3.511399  | -1.357630 |
| H  | 1.338147  | 3.112339  | -2.132501 |
| C  | 2.060624  | -0.673286 | -0.457095 |
| C  | 0.142485  | 0.215915  | 3.097632  |
| H  | -0.913582 | 0.421561  | 3.165864  |
| C  | 2.149897  | -0.896626 | 2.928661  |
| H  | 2.884503  | -1.680044 | 2.816885  |
| C  | 2.015923  | 0.769228  | -0.449561 |
| C  | 4.425711  | -1.201055 | 0.194097  |
| H  | 4.394674  | -0.403209 | 0.926526  |
| C  | 0.258392  | 4.824705  | -1.425590 |
| H  | 0.565700  | 5.448001  | -2.257285 |

|   |           |           |           |
|---|-----------|-----------|-----------|
| C | -3.015134 | -1.035858 | -2.074839 |
| C | 0.769876  | -1.269656 | -0.318627 |
| C | -0.536026 | 3.220475  | 0.690145  |
| H | -0.848911 | 2.593389  | 1.515778  |
| C | 5.167023  | 2.251786  | -1.853310 |
| H | 5.833582  | 2.082994  | -2.691051 |
| C | 0.693523  | 1.278988  | -0.289987 |
| C | -0.570768 | 5.340533  | -0.438210 |
| H | -0.910261 | 6.368065  | -0.496273 |
| C | 2.423256  | 0.496243  | 2.934943  |
| H | 3.394664  | 0.955731  | 2.830128  |
| C | 5.583819  | -1.941437 | 0.026970  |
| H | 6.450843  | -1.731549 | 0.642662  |
| C | 5.636213  | -2.944754 | -0.932652 |
| H | 6.543945  | -3.521995 | -1.065316 |
| C | 1.183723  | 1.184553  | 3.029215  |
| H | 1.050745  | 2.255847  | 3.010311  |
| C | -0.965978 | 4.536134  | 0.621739  |
| H | -1.614460 | 4.931237  | 1.395261  |
| C | -0.445854 | -3.249715 | -1.157360 |
| H | -0.929146 | -2.603827 | -1.879056 |
| C | 4.545665  | 3.510552  | 0.098270  |
| H | 4.726520  | 4.327680  | 0.787047  |
| C | 1.128427  | -3.568052 | 0.630038  |
| H | 1.874387  | -3.168727 | 1.305457  |

|   |           |           |           |
|---|-----------|-----------|-----------|
| C | 4.074030  | 1.419010  | -1.668161 |
| H | 3.892700  | 0.601521  | -2.356244 |
| C | 3.302244  | -1.462897 | -0.589276 |
| C | 5.408732  | 3.293576  | -0.968617 |
| H | 6.267338  | 3.939366  | -1.111955 |
| C | -0.099187 | -5.443221 | -0.241335 |
| H | -0.328220 | -6.502389 | -0.226730 |
| C | 3.360466  | -2.472561 | -1.549225 |
| H | 2.492716  | -2.683255 | -2.163336 |
| C | -0.732573 | -4.606448 | -1.147691 |
| H | -1.453904 | -5.007318 | -1.850289 |
| C | 0.740183  | -1.071843 | 3.022778  |
| H | 0.213265  | -2.014186 | 2.992317  |
| C | 3.205936  | 1.630806  | -0.597913 |
| C | 4.525128  | -3.204324 | -1.722673 |
| H | 4.562128  | -3.982380 | -2.476215 |
| C | 0.836910  | -4.921043 | 0.643463  |
| H | 1.342535  | -5.573160 | 1.346299  |
| C | 3.446452  | 2.688097  | 0.278496  |
| H | 2.759794  | 2.872082  | 1.096434  |
| C | -3.002257 | 1.765917  | -1.239244 |
| O | -3.045396 | 2.761046  | -1.787109 |

**Table S6.** Cartesian coordinates of the optimized  $S_0$  ground state structure of cationic form of **3** with  $s=5/2$  ( $E=-3509.4739125$ ).

|    | X         | Y         | Z         |
|----|-----------|-----------|-----------|
| W  | -2.863096 | 0.024713  | -0.194648 |
| Fe | 0.773285  | 0.233007  | 1.456433  |
| P  | -0.472718 | 0.004969  | -0.753659 |
| O  | -2.609861 | 1.902204  | 2.395136  |
| O  | -2.479875 | -2.698745 | 1.470875  |
| O  | -3.608935 | -1.783745 | -2.759197 |
| O  | -5.974052 | -0.023395 | 0.565190  |
| C  | 0.441893  | 2.710285  | -0.626979 |
| C  | -2.650113 | 1.228934  | 1.478431  |
| C  | -2.613434 | -1.743577 | 0.871937  |
| C  | 0.352394  | -2.708598 | -0.659788 |
| C  | -4.873108 | -0.001788 | 0.291006  |
| C  | 0.727597  | 3.380409  | -1.816025 |
| H  | 1.224296  | 2.851332  | -2.621777 |
| C  | 2.034966  | -0.756035 | -0.608202 |
| C  | 0.012450  | -0.036207 | 3.519011  |
| H  | -1.022796 | 0.120993  | 3.780707  |
| C  | 1.993511  | -1.048506 | 2.949295  |
| H  | 2.717714  | -1.787077 | 2.638802  |
| C  | 2.053914  | 0.692455  | -0.539865 |
| C  | 4.287818  | -1.339804 | 0.305533  |
| H  | 4.198839  | -0.525058 | 1.013885  |
| C  | 0.381006  | 4.713757  | -1.964562 |
| H  | 0.605865  | 5.226659  | -2.892576 |

|   |           |           |           |
|---|-----------|-----------|-----------|
| C | -3.320264 | -1.147361 | -1.866193 |
| C | 0.747191  | -1.295293 | -0.677721 |
| C | -0.190236 | 3.399041  | 0.405445  |
| H | -0.399337 | 2.892809  | 1.343027  |
| C | 5.400653  | 2.054860  | -1.574053 |
| H | 6.159834  | 1.859776  | -2.322540 |
| C | 0.769604  | 1.274879  | -0.499702 |
| C | -0.254237 | 5.391980  | -0.931668 |
| H | -0.526032 | 6.434068  | -1.053011 |
| C | 2.263913  | 0.312856  | 3.197990  |
| H | 3.227867  | 0.794863  | 3.122808  |
| C | 5.425096  | -2.130304 | 0.302852  |
| H | 6.216395  | -1.936765 | 1.017940  |
| C | 5.554463  | -3.161741 | -0.618267 |
| H | 6.447092  | -3.776661 | -0.623596 |
| C | 1.040462  | 0.946716  | 3.546031  |
| H | 0.916165  | 1.986545  | 3.813561  |
| C | -0.536226 | 4.734111  | 0.256940  |
| H | -1.024298 | 5.259318  | 1.069932  |
| C | -0.565754 | -3.185612 | -1.597336 |
| H | -0.922323 | -2.525428 | -2.380272 |
| C | 4.585086  | 3.347851  | 0.282339  |
| H | 4.708621  | 4.160344  | 0.989008  |
| C | 0.844944  | -3.586584 | 0.308329  |
| H | 1.568742  | -3.230996 | 1.031230  |

|   |           |           |           |
|---|-----------|-----------|-----------|
| C | 4.269138  | 1.257640  | -1.522006 |
| H | 4.148662  | 0.441746  | -2.224650 |
| C | 3.255579  | -1.580041 | -0.604437 |
| C | 5.564902  | 3.096088  | -0.669765 |
| H | 6.455321  | 3.712994  | -0.708214 |
| C | -0.506803 | -5.364396 | -0.586386 |
| H | -0.840970 | -6.394856 | -0.554579 |
| C | 3.395696  | -2.618765 | -1.527358 |
| H | 2.605964  | -2.809360 | -2.244588 |
| C | -0.990987 | -4.504999 | -1.562298 |
| H | -1.697698 | -4.862068 | -2.302698 |
| C | 0.605419  | -1.268292 | 3.139636  |
| H | 0.088837  | -2.209325 | 3.016823  |
| C | 3.277202  | 1.506618  | -0.570740 |
| C | 4.540138  | -3.398830 | -1.536973 |
| H | 4.640536  | -4.195840 | -2.264633 |
| C | 0.416418  | -4.902211 | 0.344191  |
| H | 0.803080  | -5.572380 | 1.103414  |
| C | 3.444077  | 2.565214  | 0.325052  |
| H | 2.675721  | 2.773065  | 1.061792  |
| C | -3.068920 | 1.811037  | -1.258157 |
| O | -3.179064 | 2.788071  | -1.822184 |
